# Supplementary material
Source: PubMed Central journal article supplement (PMC6946846)
Supplement: NIHMS1541979-supplement-5.pdf [file NIHMS1541979-supplement-5.pdf]

1 **Supplementary Figure 1:** Study design. In phase I of the study, the safety of three different dosing  
2 regimens of Poly-ICLC in three cohorts of 3 patients each was assessed. In Cohort 1, 3 patients  
3 received subcutaneous vaccinations of 100 µg NY-ESO-1 protein with 1.1mL Montanide and  
4 0.35mg Poly-ICLC. No DLT was observed. Three patients enrolled in Cohort 2 received 100µg  
5 NY-ESO-1 with 1.1mL Montanide and 0.7mg Poly-ICLC. Three patients in Cohort 3 received 100  
6 µg NY-ESO-1 with 1.1 mL Montanide and 1.4 mg Poly-ICLC. No DLT was observed. The 3  
7 Cohort cycles were repeated every 3 weeks for a total of 4 cycles. Phase II was done using 1.4mg  
8 Poly-ICLC as the established dose. In phase II, patients were randomized in a blinded fashion to  
9 receive a s.c. injection of 100 µg NY-ESO-1 protein and 1.4 mg of Poly-ICLC (Arm A; n=12),  
10 and emulsified with 1.4 mg of Montanide (Arm B; n=13).

11 **Supplementary Figure 2:** Evolution of antibody titers against NY-ESO-1. A. Evolution of  
12 antibody titers against NY-ESO-1 protein over the treatment for each individual patient within  
13 phase 1 of the trial (n=3 in cohort 1, 2, and 3). B. Antibody titers against NY-ESO-1 for each  
14 individual patient within the phase 2 of the study (n=12 and n=10 in arm A and B respectively).  
15 C. Individual mapping to specific regions of the NY-ESO-1 protein using 20 mer overlapping  
16 peptides covering the entire protein. Individual patients in arm A and B are shown.

17 **Supplementary Figure 3:** T-cell responses from patients within arm A and B throughout NY-  
18 ESO-1 vaccination. CD4<sup>+</sup> and CD8<sup>+</sup> T cells were isolated from PBMCs of patients and then  
19 stimulated in vitro with NY-ESO-1 overlapping peptides. NY-ESO-1-specific T cell responses  
20 were evaluated by ICS at day 14 (CD8<sup>+</sup> T; bottom panel) and day 21 (CD4<sup>+</sup> T; upper panel).  
21 Quantification of CD4<sup>+</sup> and CD8<sup>+</sup> TNF- α<sup>+</sup> and IL-2<sup>+</sup> production by intracellular cytokine staining  
22 at different time points over the vaccination treatment. Arm A (black), n=12 and Arm B (red), n=8.

23 **Supplementary Table 1:** Overlapping peptides covering the entire NY-ESO-1 protein.
